# Supplementary material
Source: MDPI journal article supplement (https://www.mdpi.com/2311-5637/9/12/1018)
Supplement: s1 [file s1]

Table S1 Primers used for PCR and qPCR in this study

| Primer name             | Sequence of primer (5' to 3') <sup>a</sup>   |
|-------------------------|----------------------------------------------|
| <b>Primers for PCR</b>  |                                              |
| <i>pgsC</i> -AF         | <u>TCTTTTCTACGAGCTCCATCATCTTTCAGGAAGAATG</u> |
| <i>pgsC</i> -AR         | <u>AAAGTACGGCTTCACATATCGGCTGATCCGTAGGA</u>   |
| <i>pgsC</i> -BF         | <u>TCCTACGGATCAGCCGATATGTGAAGCCGTACTTT</u>   |
| <i>pgsC</i> -BR         | <u>ATCCACTAGTTCTAGAGCCTGTCTGTCGTTCCGGTTC</u> |
| T2-F                    | ATGTGATAACTCGGCGTA                           |
| T2-R                    | TCTGCTGAAGCCAGTTAC                           |
| <i>pgsC</i> -KYF        | GAATATCGGAGAGCAGAAGGAG                       |
| <i>pgsC</i> -KYR        | TTGCCGAGGCTGTAGAAAATCA                       |
| <b>Primers for qPCR</b> |                                              |
| 16s rRNA-F              | ACCTAACCAGAAAGCCACGG                         |
| 16s rRNA-R              | GTTTACGGCGTGGACTACCA                         |
| <i>citZ</i> -F          | TGACGATTTCTCAGTCCGC                          |
| <i>citZ</i> -R          | TCACAGCCAGAGTATGCGTC                         |
| <i>pfkA</i> -F          | TTTTCCGAATTCAACGCCGC                         |
| <i>pfkA</i> -R          | CGACAATGACATCCCAGGCA                         |
| <i>pyk</i> -F           | CCGCTTCTTGTGCGTTTTGA                         |
| <i>pyk</i> -R           | ACTTGTGTTTCGGCGTTTTCG                        |
| <i>pgk</i> -F           | GTCCGTTCCAAACGACAAGC                         |
| <i>pgk</i> -R           | TCGGCCATGAAGTGGGAAAA                         |
| <i>icd</i> -F           | CACAACGTCAAACCTCGGCAG                        |
| <i>icd</i> -R           | AACTGGGGCTATGAAGTGCC                         |
| <i>odhA</i> -F          | GCTCTTCAACCCGTGCAATG                         |
| <i>odhA</i> -R          | AACAACCTGGACTGTCGCCAA                        |
| <i>rocG</i> -F          | CGGTCCGAATAGAACTCCCG                         |
| <i>rocG</i> -R          | AGTATGTCAGCGAGCATCCG                         |
| <i>gltA</i> -F          | GCTGCTTTTGAGCTTTCGGT                         |
| <i>gltA</i> -R          | GTCAGCGTTGTCGTTGAAGG                         |
| <i>pgsC</i> -F          | TCAAACGGCATCACCGGATA                         |
| <i>pgsC</i> -R          | AATTGTACCAGCCGGCCTC                          |
| <i>aprN</i> -F          | CCGGCTCTTCACTCTCAAGG                         |
| <i>aprN</i> -R          | CTACGCCCAGAACACCGATT                         |

<sup>a</sup> The underlines indicate an overlap region for splicing overlap extension PCR (SOE- PCR); Generated restriction site in bold.

Table S2 The concentrations of amino acids in the acid hydrolysate of soybean meal

| <b>Amino acid</b>  | <b>Content in the acid hydrolysate<br/>(mg/L)</b> |
|--------------------|---------------------------------------------------|
| Glutamic acid      | 2718.3                                            |
| Alanine            | 2087.0                                            |
| Aspartic acid      | 1828.1                                            |
| Phenylalanine      | 1104.5                                            |
| Lysine             | 1045.7                                            |
| Leucine            | 1017.4                                            |
| Glycine            | 676.9                                             |
| Serine             | 609.1                                             |
| Valine             | 593.0                                             |
| Threonine          | 540.0                                             |
| Tyrosine           | 526.2                                             |
| Isoleucine         | 469.8                                             |
| Methionine         | 215.3                                             |
| Total <sup>a</sup> | 13431.3                                           |

<sup>a</sup> The concentration of soybean meal in the acid hydrolysate is 30 g/L, and the protein content in soybean meal is 46%, so the protein content in the acid hydrolysate is 13.8 g/L.
